# Supplementary material
Source: PubMed Central journal article supplement (PMC3629834)
Supplement: supp_mol.112.083519_Suppl_Fig_1.pdf [file supp_mol.112.083519_Suppl_Fig_1.pdf]

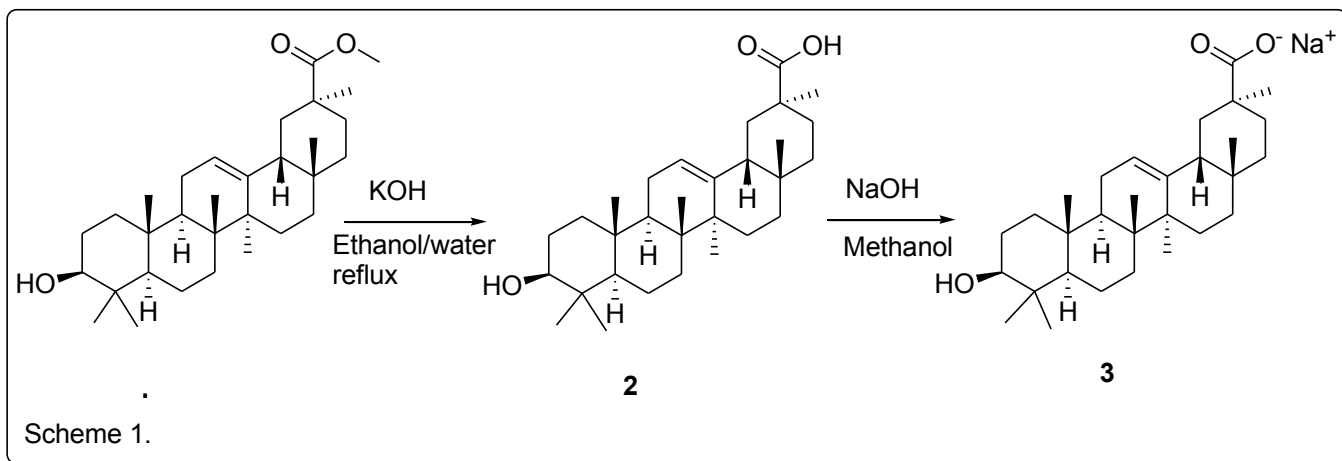

**Suppl. Fig. 1. Two-step chemical conversion of 3'-hydroxy-olean-12-en-29-oic acid methyl ester into “HENA”.** 3'-hydroxy-olean-12-en-29-oic acid methyl ester ( compound 1) was hydrolyzed to obtain 3'-hydroxy-olean-12-en-29-oic acid (compound 2). Purified acid (2) was further converted to the corresponding sodium salt (compound 3, “HENA”).
