# Supplementary material
Source: PubMed Central journal article supplement (PMC3629834)
Supplement: supp_mol.112.083519_Suppl_Fig_2.pdf [file supp_mol.112.083519_Suppl_Fig_2.pdf]

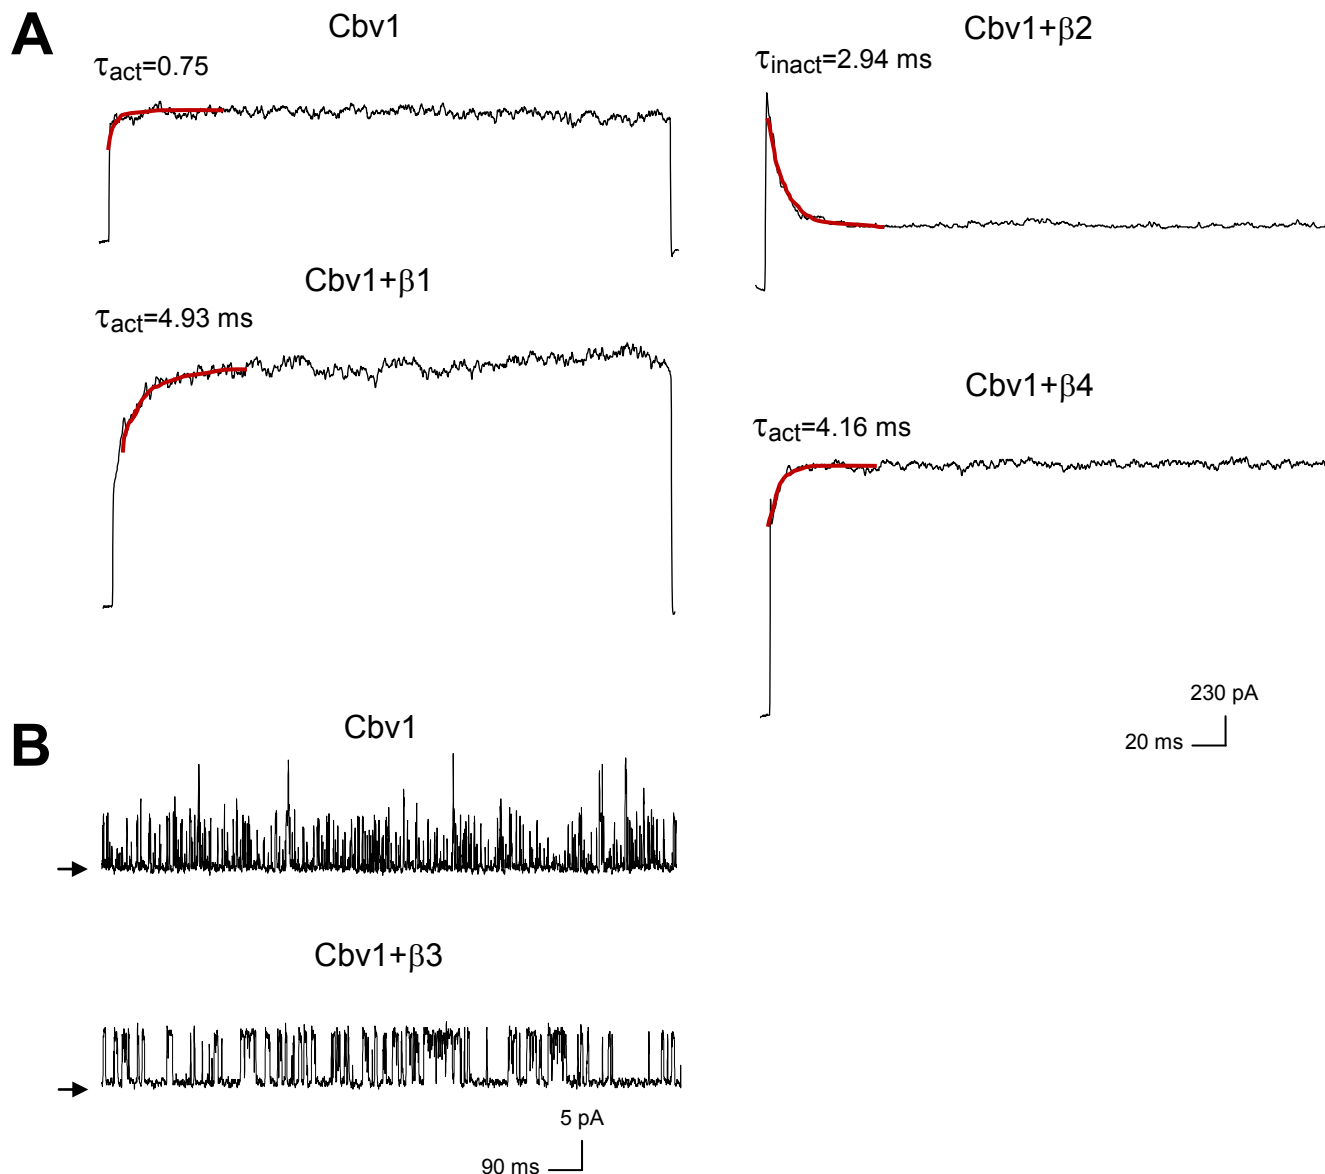

**Suppl. Fig. 2. Phenotypic characterization of macroscopic and single-channel currents evoked by  $cbv1+\beta(1-4)$  subunit expression in *Xenopus laevis* oocytes.** A. Representative current records from I/O macropatches expressing different BK channel subunit combinations ( $cbv1\pm\beta 1$ ,  $\beta 2$ , or  $\beta 4$ ). Macroscopic currents were evoked by 200 ms-long, 10 mV depolarizing steps from  $-150$  to  $+70$  mV from a holding potential=0 mV. Red fitting lines underscore the different current activation/inactivation kinetics for each channel subunit combination. B. Original records of single BK channel activity showing that expression of  $cbv1+\beta 3$  heteromers results in longer channel openings when compared to those from homomeric  $cbv1$ .  $V_m=+40$ mV, free  $[Ca^{2+}]_i=10$   $\mu$ M.
