# Supplementary material
Source: PubMed Central journal article supplement (PMC3629834)
Supplement: supp_mol.112.083519_Suppl_Fig_3.pdf [file supp_mol.112.083519_Suppl_Fig_3.pdf]

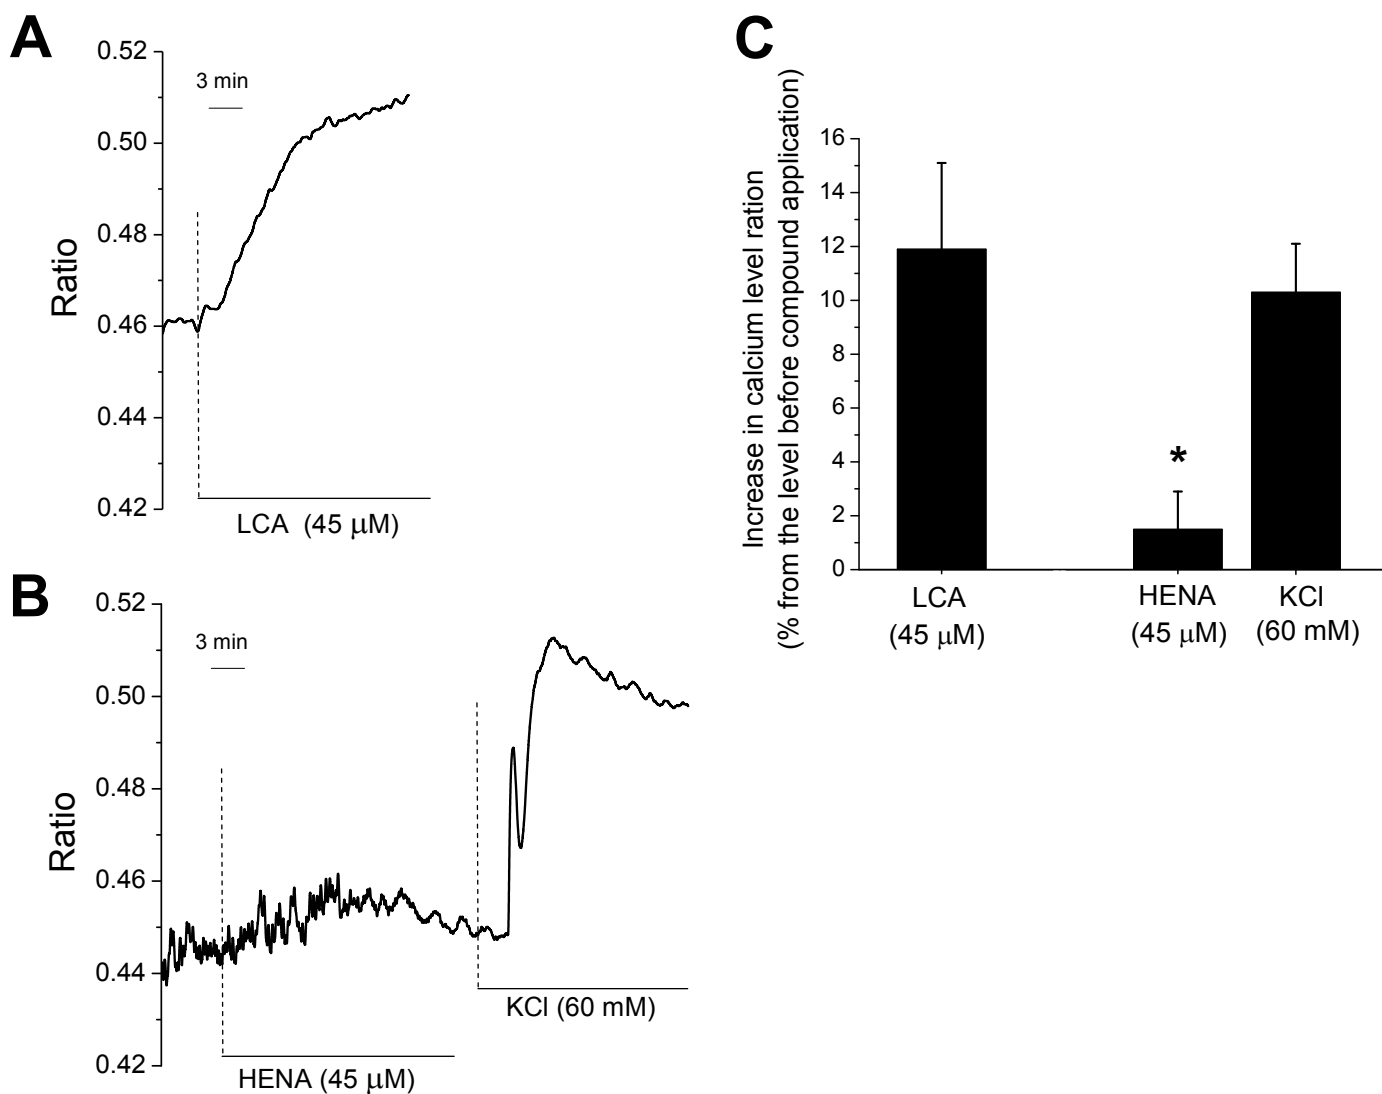

**Suppl. Fig. 3. Ratiometric detection of changes in arterial wall  $[Ca^{2+}]_i$  in presence of LCA vs. HENA.**

A. Original trace showing LCA-induced increase in  $[Ca^{2+}]_i$ . B. Original trace showing lack of  $[Ca^{2+}]_i$  increase by HENA, with high KCl being used as positive control. C. Averaged changes in arterial wall  $[Ca^{2+}]_i$  evoked by LCA, HENA, and KCl. \*Different from LCA-induced increase in arterial wall  $[Ca^{2+}]_i$  ( $P < 0.05$ ). In A-C, data were obtained in the presence of BK channel selective blockade by 1  $\mu$ M paxilline.
